# Supplementary material
Source: MDPI journal article supplement (https://www.mdpi.com/2571-8800/3/2/14)
Supplement: s1 [file s1 › J-732454 Supplementary Table S1.xlsx]

## Sheet: Physico_Micro_parasitol
Antaccocha																Pueblo libre													Pampachacra															San Gerónimo
	Springs						Water reservoirs				Households						Springs								Water reservoirs	Households				Springs					Water reservoirs		Households								Springs			Water reservoirs
Physico-chemical parameters	AN1 (Yuraccancha)	AN2 (Jasaccacucho)	AN3	AN4 (Pichccapuquio)	AN5	ECA Cat. 1 – Subcat. A1	Sector 1 water reservoir (AN6)	Sector 2 water reservoir (AN7)	Sector 3 and 5 water reservoir (AN8)	Sector 4 water reservoir (AN9)	Sector 1 household (AN10)	Sector 2 household (AN11)	Sector 4 household (AN12)	Regulation (DS Nº 031-2010-SA)		Physico-chemical parameters	PU1	PU2	PU3	PU4	PU5	PU6	PU7	ECA Cat. 1 – Subcat. A1	Water reservoir (PU8)	Household (PU9)	Regulation (DS Nº 031-2010-SA)		Physico-chemical parameters	PA1	PA2	PA3	PA4	ECA Cat. 1 – Subcat. A1	Barrio Villa Libertad water reservoir (PA5)	Barrio Imperial water reservoir (PA6)	Barrio Villa Libertad household (PA7)	Barrio Imperial household (PA8)	Barrio Condorsenca household (PA9)	Barrio Centro household (PA10)	Barrio Miraflores household (PA11)	Regulation (DS Nº 031-2010-SA)		Physico-chemical parameters	SG1	SG2	ECA Cat. 1 – Subcat. A1	Puquiocucho water reservoir (SG3)	Putaccapuquio water reservoir (SG4)
Temperature (℃)	9.5	9.2	8.9	9	11	∆3	10.5	9.2	10.5	10.2	12.1	10.9	10.5	NA		Temperature (℃)	11.2	9.6	11.5	12.1	13.2	15.1	15.4	∆3	14.7	13.7	NA		Temperature (℃)	16.5	13.5	12.7	12.6	∆3	13.9	14.5	16.3	14.3	12.3	13.6	12.3	NA		Temperature (℃)	16.1	15	∆3	16.1	15.5
Turbidity (UNT)	0	0	16.34	0.46	83	5	0	0	0	2.63	26.44	0	5.14	5		Turbidity (UNT)	4.8	2.6	3.2	2.8	3.9	0.2	2.1	5	0	0	5		Turbidity (UNT)	0.07	0.22	0	4.45	5	0.94	2.3	7.8	0.1	0.02	0.19	0.01	5		Turbidity (UNT)	0.0	1.3	5	0.0	0.9
pH	7.8	7.8	8	8.1	7.9	6.5-8.5	7.9	8	8.1	8.2	8.5	8.1	8.2	6.5-8.5		pH	7.5	7.8	7.9	7.6	7.6	7.8	7.5	6.5-8.5	7.8	7.8	6.5-8.5		pH	7.4	7.9	7.8	7.9	6.5-8.5	7.5	7.9	7.6	8.1	8.1	7.9	8.2	6.5-8.5		pH	8.2	7.9	6.5-8.5	8.4	8.5
Conductivity (µS/cm)	42.4	58	37.5	37.8	503	1500	43.9	60.2	135.4	37.9	394	59.7	42.5	1500		Conductivity (µS/cm)	102.3	90.3	101.4	103.6	65.5	75.6	61	1500	105.8	87.5	1500		Conductivity (µS/cm)	207.2	49.5	49.8	46.2	1500	205.3	51.8	197.5	52.1	45.2	104.5	197.6	1500		Conductivity (µS/cm)	428	441	1500	420	380
Free residual chlorine (mg/L)	NA	NA	NA	NA	NA	NA	1.47	0	0	0	0.07	0	0	0.5-5		Free residual chlorine (mg/L)	NA	NA	NA	NA	NA	NA	NA	NA	0	0	0.5-5		Free residual chlorine (mg/L)	0.11	NA	NA	NA	NA	0.12	0.03	0.1	0	0	0	0	0.5-5		Free residual chlorine (mg/L)	NA	NA	NA	4.2	6.5
Color (UCV Pt/Co)	<1	<1	<1	<1	<1	15	<1	<1	<1	<1	<1	<1	<1	15		Color (UCV Pt/Co)	<1	<1	<1	<1	<1	<1	<1	15	<1	<1	15		Color (UCV Pt/Co)	<1	<1	<1	<1	15	<1	<1	<1	<1	<1	<1	<1	15		Color (UCV Pt/Co)	<1	<1	15	<1	<1
Total hardness (mg CaCO3/L)	80.1	90.1	80.1	60.1	330	500	-	-	-	-	-	-	-	500		Total hardness (mg CaCO3/L)	80.1	70.1	100	90.1	90.1	80.1	70.1	500	-	-	500		Total hardness (mg CaCO3/L)	140	80.1	70.1	70.1	500	-	-	-	-	-	-	-	500		Total hardness (mg CaCO3/L)	320	260	500	-	-
Chlorides (mg/L)	3.51	3.51	2.01	4.01	7.52	250	-	-	-	-	-	-	-	250		Chlorides (mg/L)	4.51	5.01	4.01	4.01	4.51	2.51	5.01	250	-	-	250		Chlorides (mg/L)	11.03	2.51	12.54	4.51	250	-	-	-	-	-	-	-	250		Chlorides (mg/L)	2.51	1.5	250	-	-
Nitrates (mg/L)	1.2	3.93	0.97	0.992	3.45	50	-	-	-	-	-	-	-	50		Nitrates (mg/L)	5.81	1.14	9.65	12.75	1.52	1.97	2.36	50	-	-	50		Nitrates (mg/L)	25509	1032	117.6	1081	50	-	-	-	-	-	-	-	50		Nitrates (mg/L)	1.13	0.775	50	-	-
Nitrites (mg/L)	<0.007	<0.007	<0.007	< 0.007	<0.007	3	-	-	-	-	-	-	-	3		Nitrites (mg/L)	<0.007	< 0.007	0.054	< 0.007	< 0.007	< 0.007	< 0.007	3	-	-	3		Nitrites (mg/L)	0.164	< 0.007	< 0.007	<0.007	3	-	-	-	-	-	-	-	3		Nitrites (mg/L)	< 0.007	< 0.007	3	-	-
Sulfates (mg/L)	2.18	1.14	0.183	0.342	15.52	250	-	-	-	-	-	-	-	250		Sulfates (mg/L)	10.61	10.61	29.12	15.14	9.39	20.95	14.25	250	-	-	250		Sulfates (mg/L)	18.18	0.849	0.751	1.21	250	-	-	-	-	-	-	-	250		Sulfates (mg/L)	69.9	20.22	250	-	-
	Springs						Water reservoirs				Households						Springs								Water reservoirs	Households				Springs					Water reservoirs		Households								Springs			Water reservoirs
Microbiological and parasitological parameters	AN1 (Yuraccancha)	AN2 (Jasaccacucho)	AN3	AN4 (Pichccapuquio)	AN5	ECA Cat. 1 – Subcat. A1	Sector 1 water reservoir	Sector 2 water reservoir	Sector 3 and 5 water reservoir	Sector 4 water reservoir	Sector 1 household	Sector 2 household	Sector 4 household	Regulation (DS Nº 031-2010-SA)		Microbiological and parasitological parameters	PU1	PU2	PU3	PU4	PU5	PU6	PU7	ECA Cat. 1 – Subcat. A1	Water reservoir	Household	Regulation (DS Nº 031-2010-SA)		Microbiological and parasitological parameters	PA1	PA2	PA3	PA4	ECA Cat. 1 – Subcat. A1	Barrio Villa Libertad water reservoir (PA5)	Barrio Imperial water reservoir (PA6)	Barrio Villa Libertad household (PA7)	Barrio Imperial household (PA8)	Barrio Condorsenca household (PA9)	Barrio Centro household (PA10)	Barrio Miraflores household (PA11)	Regulation (DS Nº 031-2010-SA)		Microbiological and parasitological parameters	SG1	SG2	ECA Cat. 1 – Subcat. A1	Puquiocucho water reservoir (SG3)	Putaccapuquio water reservoir (SG4)
Total coliforms (MPN/100mL)	0	0	0	0	4	50	0	0	0	0	21	0	9	≤1.8		Total coliforms (MPN/100mL)	43	240	0	0	0	23	0	50	21	0	≤1.8		Total coliforms (MPN/100mL)	0	0	0	0	50	0	0	0	0	0	0	0	≤1.8		Total coliforms (MPN/100mL)	7.3	0	50	0	0
Thermotolerant (faecal) coliforms (MPN/100mL)	0	0	0	0	0	20	0	0	0	0	0	0	-	≤1.8		Thermotolerant (faecal) coliforms (MPN/100mL)	9.1	0	0	0	0	0	0	20	0	0	≤1.8		Thermotolerant (faecal) coliforms (MPN/100mL)	0	0	0	0	20	0	0	0	0	0	0	0	≤1.8		Thermotolerant (faecal) coliforms (MPN/100mL)	7.3	0	20	0	0
Parasites (Nº org/L)	0	0	-	0	-	0	-	-	-	-	-	-	-	0		Parasites (Nº org/L)	0	0	0	0	0	0	0	0	0	0	0		Parasites (Nº org/L)	0	0	0	0	0	-	-	-	-	-	-	-	0		Parasites (Nº org/L)	Nematodirus sp., Strongiloides sp. and Cooperia sp.	0	0	Nematodirus sp., Cooperia sp. and Strongiloides sp.	0
Free-living organisms (algae, protozoa, copepods, rotifers, nematodes in all their evolutionary states) (Nº org/L)	0	0	-	0	-	0	-	-	-	-	-	-	-	0		Free-living organisms (algae, protozoa, copepods, rotifers, nematodes in all their evolutionary states) (Nº org/L)	Diatoms	Diatoms	0	0	Euglena sp. and Paramecium sp.	0	0	0	Diatoms, algae, Euglena sp. and Paramecium sp.	Euglena sp. and Paramecium sp.	0		Free-living organisms (algae, protozoa, copepods, rotifers, nematodes in all their evolutionary states) (Nº org/L)	Algae and copepods	Algae and Euglena sp.	0	0	0	-	-	-	-	-	-	-	0		Free-living organisms (algae, protozoa, copepods, rotifers, nematodes in all their evolutionary states) (Nº org/L)	Algae	Copepods	0	0	Copepods and algae
[truncated: 12 more columns]

## Sheet: inorgánic
	Inorganic parameters - Method of analysis
Community	Mo (mg/L)		Mn (mg/L)		Cd (mg/L)		As (mg/L)		Cu (mg/L)		Cr (mg/L)		Zn (mg/L)		Al (mg/L)
	AAS	ICP-MS	AAS	ICP-MS	AAS	ICP-MS	AAS	ICP-MS	AAS	ICP-MS	AAS	ICP-MS	AAS	ICP-MS	AAS	ICP-MS
Antaccocha
AN1	0.11	<0.0002	< 0.006	0.00092	< 0.0039	<0.00005	<0.12	<0.0005	< 0.0099	<0.0003	<0.015	<0.0005	0.00741	0.0021	< 0.09	0.01629
AN2	0.10	<0.0002	< 0.006	0.00063	< 0.0039	<0.00005	<0.12	<0.0005	0.015	<0.0003	<0.015	<0.0005	0.00693	0.0064	< 0.09	0.01829
AN3	0.06	<0.0002	< 0.006	0.00431	< 0.0039	<0.00005	<0.12	<0.0005	0.012	<0.0003	<0.015	<0.0005	0.00674	0.0037	0.12275	0.187
AN4	0.12	<0.0002	< 0.006	0.00578	< 0.0039	<0.00005	<0.12	<0.0005	0.016	<0.0003	<0.015	<0.0005	0.00596	0.004	0.21218	0.2662
AN5	0.06	<0.0002	0.05	0.02029	< 0.0039	<0.00005	<0.12	<0.0005	< 0.0099	0.00231	<0.015	0.00306	0.00863	0.0198	3.47493	0.6782
Pueblo libre
PU1	0.0599	<0.0002	< 0.006	0.00187	0.0042	<0.00005	<0.12	<0.0005	0.0156	<0.0003	<0.015	<0.0005	< 0.003	0.003	< 0.09	0.00843
PU2	0.0661	<0.0002	0.0456	0.04446	0.0083	<0.00005	<0.12	<0.0005	0.0216	<0.0003	<0.015	<0.0005	< 0.003	0.0043	< 0.09	0.0079
PU3	0.0743	<0.0002	< 0.006	0.0076	0.0111	<0.00005	<0.12	<0.0005	0.0230	<0.0003	<0.015	<0.0005	0.00371	0.0086	< 0.09	0.02019
PU4	0.0728	<0.0002	< 0.006	0.00197	0.0109	<0.00005	<0.12	<0.0005	0.0257	<0.0003	<0.015	<0.0005	0.00401	0.0073	< 0.09	0.03098
PU5	0.0712	<0.0002	< 0.006	0.08141	0.0108	<0.00005	<0.12	<0.0005	0.0275	<0.0003	<0.015	<0.0005	0.00359	0.0029	< 0.09	0.03898
PU6	0.0711	<0.0002	< 0.006	0.00484	0.0113	<0.00005	<0.12	<0.0005	0.0275	<0.0003	<0.015	<0.0005	0.00684	0.0055	< 0.09	0.08187
PU7	0.0726	<0.0002	< 0.006	0.00782	0.0108	<0.00005	<0.12	<0.0005	0.0309	<0.0003	<0.015	<0.0005	0.00545	0.0046	< 0.09	0.02383
Pampachacra
PA1	< 0.03	<0.0002	< 0.006	0.00743	< 0.0039	<0.00005	<0.12	<0.0005	< 0.0099	<0.0003	<0.015	<0.0005	0.01327	<0.0005	< 0.09	0.01492
PA2	< 0.03	<0.0002	< 0.006	0.00082	< 0.0039	<0.00005	<0.12	0.00755	< 0.0099	<0.0003	<0.015	<0.0005	0.00914	<0.0005	< 0.09	0.02241
PA3	< 0.03	<0.0002	< 0.006	0.00282	< 0.0039	<0.00005	<0.12	0.00225	0.010	<0.0003	<0.015	<0.0005	0.00745	0.0024	< 0.09	0.0739
PA4	< 0.03	<0.0002	< 0.006	0.01908	< 0.0039	<0.00005	<0.12	0.00241	0.011	<0.0003	<0.015	<0.0005	0.01158	0.0129	< 0.09	0.4514
San gerónimo
SG1	< 0.03	<0.0002	< 0.006	0.001	0.0104	<0.00005	<0.12	< 0.0005	0.0365	<0.0003	<0.015	<0.0005	0.00392	0.0031	< 0.09	0.01511
SG2	< 0.03	0.00146	< 0.006	< 0.00025	0.0103	<0.00005	<0.12	0.00326	0.0356	<0.0003	<0.015	<0.0005	0.00405	0.009	< 0.09	0.01369
Sachapite
SA1	< 0.03	<0.0002	< 0.006	0.00835	< 0.0039	<0.00005	<0.12	< 0.0005	< 0.0099	<0.0003	<0.015	<0.0005	0.01442	0.004	< 0.09	0.05489
SA2	< 0.03	<0.0002	< 0.006	< 0.00025	< 0.0039	<0.00005	<0.12	< 0.0005	0.013	<0.0003	<0.015	<0.0005	0.01331	0.0019	< 0.09	0.02583
LOD	0.03	0.0002	0.006	0.00025	0.0039	5e-05	0.12	0.0005	0.0099	0.0003	0.015	0.0005	0.003	0.0005	0.09	0.0025
ECA Cat. 1 – Subcat. A1	0.07		0.4		0.003		0.01		2		0.05		3		0.9
WHO	-		-		0.003		0.01		2		0.05		-		0.1

## Sheet: Legend
	Description of sampling points (springs, water reservoir, and households)
	Community	Description	Label	Elevation (m.a.s.l.)
	Pueblo libre	Spring 1	PU1	4188
	Pueblo libre	Spring 2	PU2	4181
	Pueblo libre	Spring 3	PU3	4184
	Pueblo libre	Spring 4	PU4	4179
	Pueblo libre	Spring 6	PU5	4175
	Pueblo libre	Spring 8	PU6	4170
	Pueblo libre	Spring 9	PU7	4154
	Pueblo libre	Water reservoir	PU8	4072
	Pueblo libre	Household	PU9	3899
	San Gerónimo	Spring Puquiocucho 1	SG1	3893
	San Gerónimo	Spring Putaccapuquio	SG2	3822
	San Gerónimo	Puquiocucho water reservoir	SG3	3821
	San Gerónimo	Putaccapuquio water reservoir	SG4	3757
	San Gerónimo	Puquiocucho household	SG5	3771
	San Gerónimo	Putaccapuquio household	SG6	3720
	Sachapite	Spring Huariccacca	SA1	4328
	Sachapite	Spring Picchapuquio	SA2	4273
	Sachapite	Huariccacca water reservoir	SA3	4191
	Sachapite	Picchapuquio water reservoir	SA4	4206
	Sachapite	Huariccacca household	SA5	4121
	Sachapite	Picchapuquio household	SA6	4162
	Pampachacra	Spring Barrio Villa Libertad	PA1	3957
	Pampachacra	Spring Barrio Imperial (Asto1)	PA2	4258
	Pampachacra	Spring Barrio Imperial (Asto2)	PA3	4279
	Pampachacra	Spring 1 Barrio Condorsenca	PA4	4296
	Pampachacra	Barrio Villa Libertad water reservoir	PA5	3925
	Pampachacra	Barrio Imperial water reservoir	PA6	4101
	Pampachacra	Barrio Villa Libertad household	PA7	3888
	Pampachacra	Barrio Imperial household	PA8	4037
	Pampachacra	Barrio Condorsenca household	PA9	4055
	Pampachacra	Barrio Centro household	PA10	4000
	Pampachacra	Barrio Miraflores household	PA11	4027
	Antaccocha	Spring sector 1	AN1	4176
	Antaccocha	Spring sector 2	AN2	4176
	Antaccocha	Spring sector 3 and 5	AN3	4246
	Antaccocha	Spring sector 4	AN4	4259
	Antaccocha	Spring Mulaccarana	AN5	3893
	Antaccocha	Sector 1 water reservoir	AN6	3979
	Antaccocha	Sector 2 water reservoir	AN7	4108
	Antaccocha	Sector 3 and 5 water reservoir	AN8	4005
	Antaccocha	Sector 4 water reservoir	AN9	3991
	Antaccocha	Sector 1 household	AN10	3839
	Antaccocha	Sector 2 household	AN11	3911
	Antaccocha	Sector 4 household	AN12	3780
